# Supplementary material for: Preparation of copper doped magnetic porous carbon for removal of methylene blue by a heterogeneous Fenton-like reaction
Source: Royal Society of Chemistry journal article supplement (doi:10.1039/c5ra12621e), 2015-01-01
Supplement: c5ra12621e1.pdf [file c5ra12621e1.pdf]

## Preparation of Copper Doped Magnetic Porous Carbon for Removal of Methylene Blue by a Heterogeneous Fenton-like Reaction

Chao Bao<sup>1</sup>, He Zhang<sup>1</sup>, Lincheng Zhou<sup>\*</sup>, Yanming Shao, Junjun Ma, Qiong Wu

*State Key Laboratory of Applied Organic Chemistry, College of Chemistry and Chemical Engineering, Institute of Biochemical Engineering & Environmental Technology, Lanzhou University, Lanzhou 730000, P. R. China*

Chao Bao E-mail: baoch13@lzu.edu.cn Fax: 86-931-8912113 Tel. 86-931-8912528

Address: College of Chemistry and Chemical Engineering, Lanzhou University, Lanzhou 730000,  
P.R.China

He Zhang E-mail :zhangh12@lzu.edu.cn Fax: 86-931-8912113 Tel. 86-931-8912528

Address: College of Chemistry and Chemical Engineering, Lanzhou University, Lanzhou 730000,  
P.R.China

Lincheng Zhou E-mail: zhoulc@lzu.edu.cn Fax: 86-931-8912113 Tel. 86-931-8912528

Address: College of Chemistry and Chemical Engineering, Lanzhou University, Lanzhou 730000,  
P.R.China

Yanming Shao E-mail: shaoyml1@lzu.edu.cn Fax: 86-931-8912113 Tel. 86-931-8912528

Address: College of Chemistry and Chemical Engineering, Lanzhou University, Lanzhou 730000,  
P.R.China

Junjun Ma E-mail: majj12@lzu.edu.cn Fax: 86-931-8912113 Tel. 86-931-8912528

Address: College of Chemistry and Chemical Engineering, Lanzhou University, Lanzhou 730000,  
P.R.China

Qiong Wu E-mail: qwu14@lzu.edu.cn Fax: 86-931-8912113 Tel. 86-931-8912528

Address: College of Chemistry and Chemical Engineering, Lanzhou University, Lanzhou 730000,  
P.R.China

---

<sup>\*</sup>Corresponding author. Tel: 86-931-8912528. E-mail: Zhoulc@lzu.edu.cn (Zhou lincheng)

<sup>1</sup>These authors contributed equally to this work.

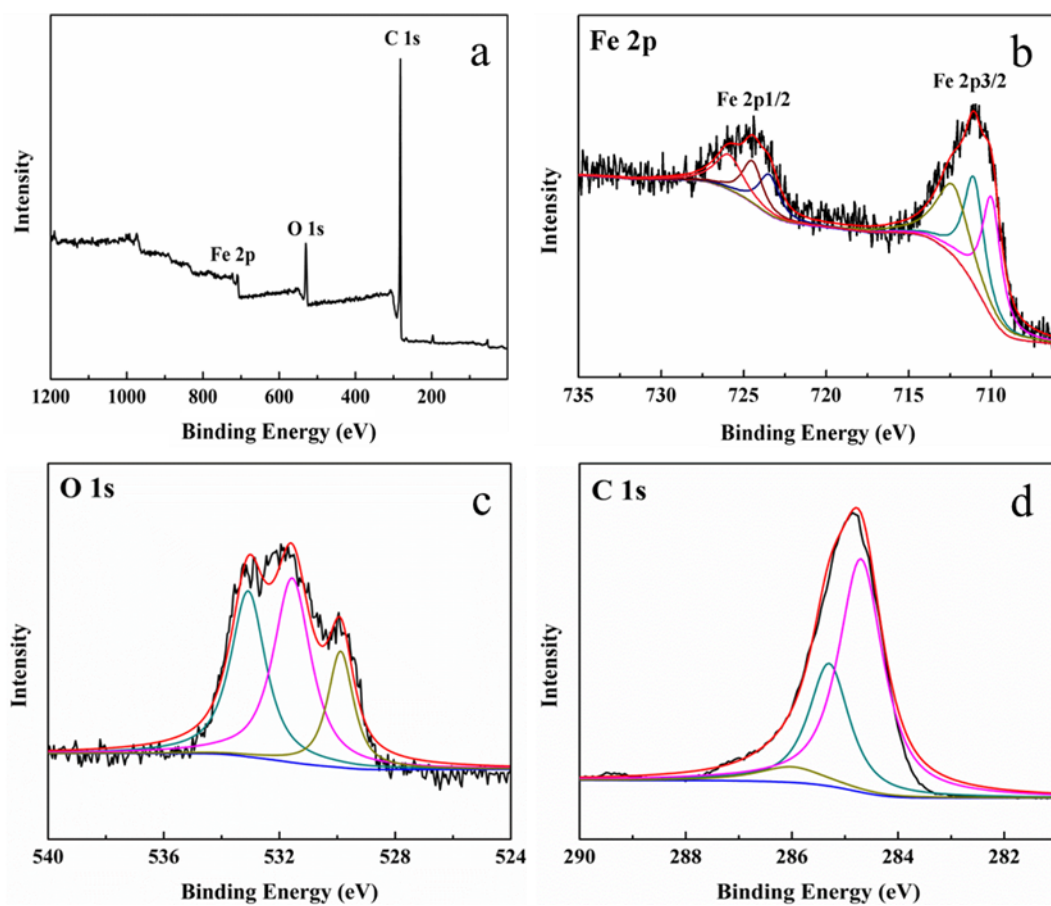

Fig. S1 XPS spectra of Fe<sub>3</sub>O<sub>4</sub>@C: survey spectrum (a), high resolution of Fe spectrum (b), high resolution of O spectrum (c), and high resolution of C spectrum (d).

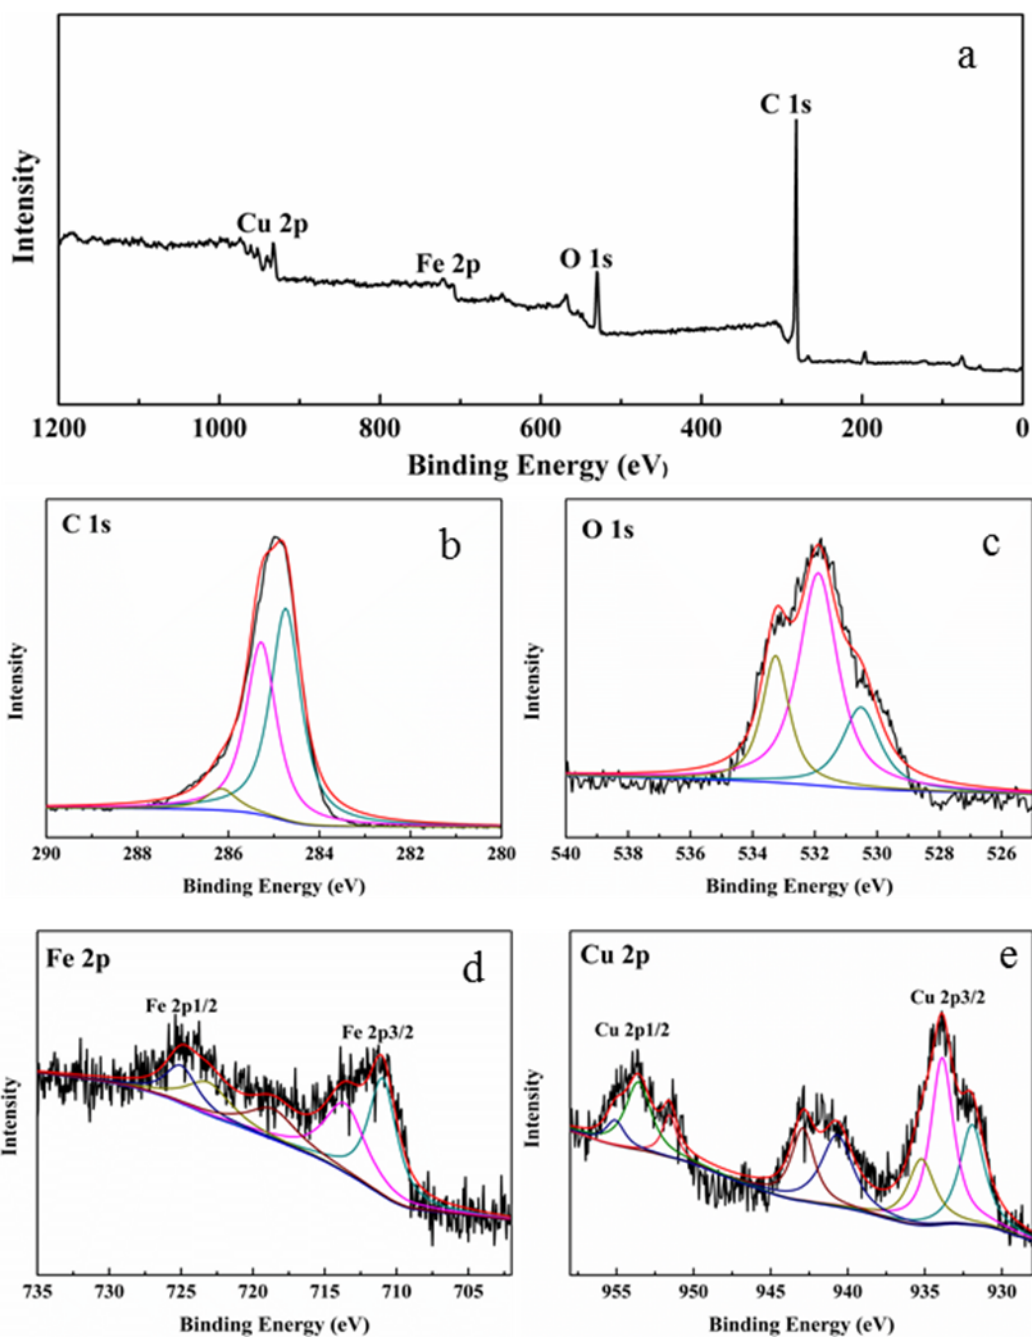

Fig. S2 XPS spectra of CuFe<sub>2</sub>O<sub>4</sub>/Cu@C: survey spectrum (a), high resolution of C spectrum (b), high resolution of O spectrum (c), high resolution of Fe spectrum (d), and high resolution of Cu spectrum (e).
